# Supplementary material for: Genome-Wide Screen of miRNAs and Targeting mRNAs Reveals the Negatively Regulatory Effect of miR-130b-3p on PTEN by PI3K and Integrin β1 Signaling Pathways in Bladder Carcinoma
Source: Int J Mol Sci. 2016 Dec 31;18(1):78. doi: 10.3390/ijms18010078 (PMC5297712; doi:10.3390/ijms18010078)
Supplement: Supplementary file 1 [file ijms-18-00078-s001.pdf]

# Supplementary Materials: Genome-Wide Screen of miRNAs and Targeting mRNAs Reveals the Negatively Regulatory Effect of miR-130b-3p on PTEN by PI3K and Integrin $\beta$ 1 Signaling Pathways in Bladder Carcinoma

Mengxin Lv, Zhenyu Zhong, Hong Chi, Mengge Huang, Rong Jiang and Junxia Chen

**Table S1.** Clinical pathologic characteristics of study subjects.

| Characteristic   |                 | Number of Patients |
|------------------|-----------------|--------------------|
| All patients     |                 | 30 (100%)          |
| Gender           | Male            | 21 (70%)           |
|                  | Female          | 9 (30%)            |
| Age at diagnosis | <70 years       | 24 (80%)           |
|                  | $\geq$ 70 years | 6 (20%)            |
| Pathologic grade | Low grade       | 8 (26.7%)          |
|                  | High grade      | 22 (73.3%)         |
| TNM stage        | Ta              | 1 (3.3%)           |
|                  | T1              | 5 (16.7%)          |
|                  | $\geq$ T2       | 24 (80%)           |
|                  | N0              | 23 (76.7%)         |
|                  | $\geq$ N1       | 7 (23.3%)          |
|                  | M0              | 29 (96.7%)         |
|                  | M1              | 1 (3.3%)           |

TNM: Tumor Node Metastasis.
